# Supplementary material for: Altered increase in STAT1 expression and phosphorylation in severe COVID‐19
Source: PubMed Central journal article supplement (PMC8646801; doi:10.1002/eji.202149575), 2021-11-17
Supplement: EJI-52-138-s001.pdf [file EJI-52-138-s001.pdf]

Fig S1

A

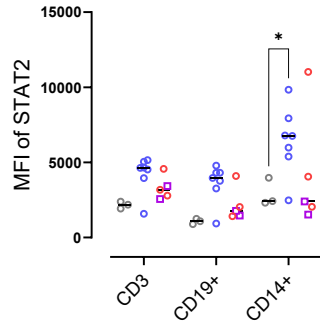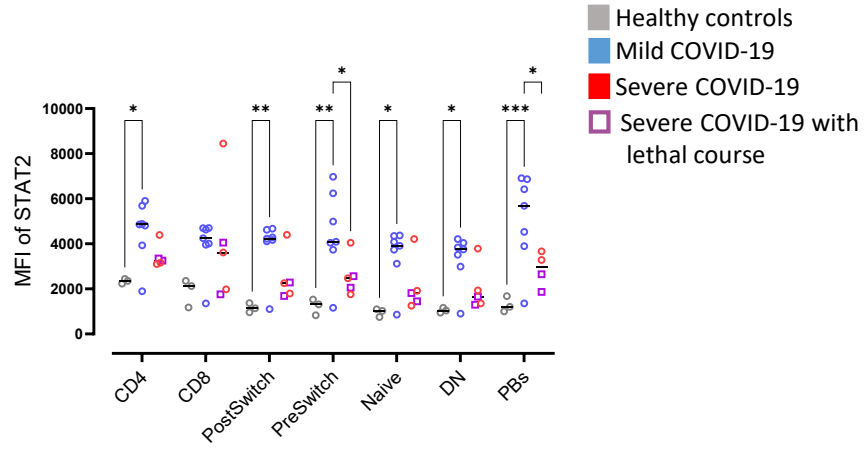

B

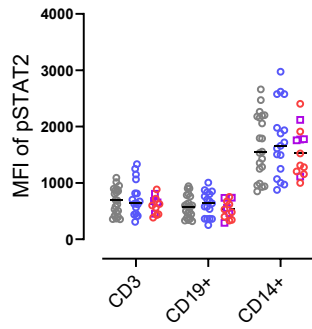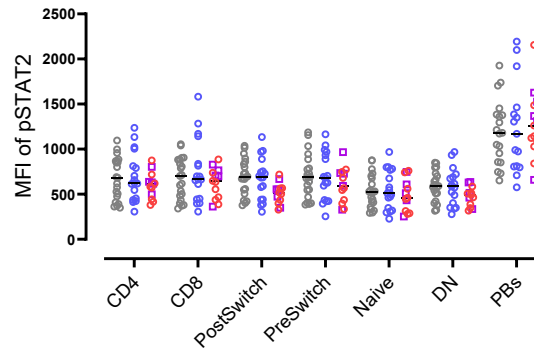

C

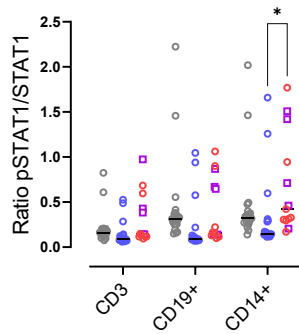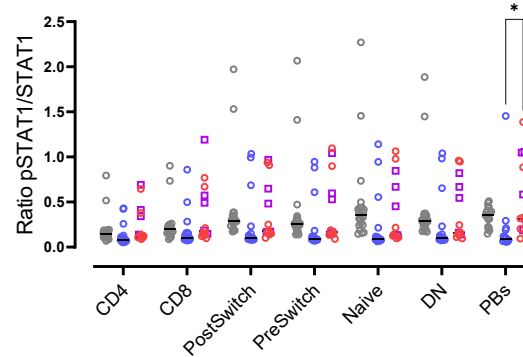

### **Figure S1 Reduced STAT2 expression in severe COVID-19 patients**

(A) Median fluorescence intensity (MFI) of STAT2 in CD3+, CD19 and CD14+ cells, as well in T and B cell subsets. Median from healthy controls (n=3), mild COVID-19 (n=7) and severe COVID-19 (n=5) patients. (B) MFI of pSTAT2 in CD3+, CD19 and CD14+ cells, as well in T and B cell subsets. Median from healthy controls (n=20), mild COVID-19 (n=17) and severe COVID-19 (n=13) patients. (C) Ratio pSTAT/STAT1 in CD3+, CD19 and CD14+ cells, as well in T and B cell subsets. Median from healthy controls (n=20), mild COVID-19 (n=17) and severe COVID-19 (n=13) patients. Two way ANOVA with Sidack post-test. \*p<0.05, \*\*p<0.01, \*\*\*p<0.001 and \*\*\*\*p<0.0001. Deceased patients are indicated as purple quadrats.
